# Supplementary material for: MAP3K19 Affects TWEAK-Induced Response in Cultured Bronchial Epithelial Cells and Regulates Allergic Airway Inflammation in an Asthma Murine Model
Source: MDPI journal article supplement (doi:10.3390/cimb45110559), 2023-11-08
Supplement: s1 [file s1]

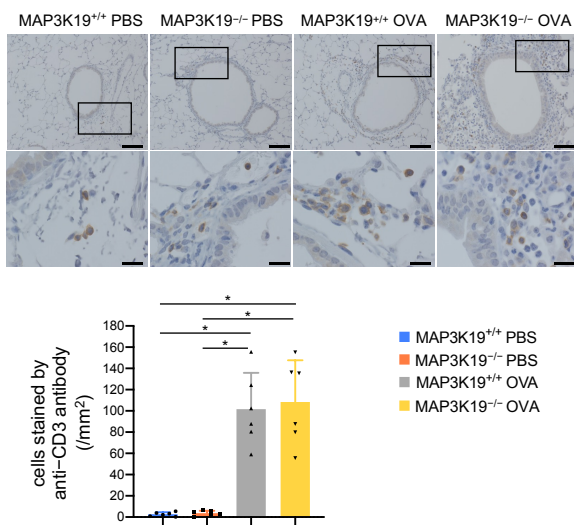

**Supplementary Figure S2.** There is no significant difference in the number of CD3-positive T cells between WT and MAP3K19-deficient. Lung tissues from mice were removed and were stained with anti-CD3 antibody. Scale bars: 20  $\mu\text{m}$  (upper panels), 100  $\mu\text{m}$  (lower panels). Graph showing the percentage of CD3-positive T cells in each lung section. Data represent the means  $\pm$  SD ( $n = 6$  mice per group). \* $p < 0.05$ . Abbreviations: MAP3K19: Mitogen-Activated Protein Kinase Kinase Kinase 19; SD: standard deviation.
