# Supplementary material for: MAP3K19 Affects TWEAK-Induced Response in Cultured Bronchial Epithelial Cells and Regulates Allergic Airway Inflammation in an Asthma Murine Model
Source: Curr Issues Mol Biol. 2023 Nov 8;45(11):8907–24. doi: 10.3390/cimb45110559 (PMC10670632; doi:10.3390/cimb45110559)
Supplement: Supplementary file 1 [file cimb-45-00559-s001.zip]

Archive with 5 entries (5 files):
- AAIR-2022-0298 Supplementary Table S1.xlsx
- AAIR-2022-0298 Supplementary Table S2.xlsx
- AAIR-2022-0298 Supplementary Table S3.xlsx
- CIMB-2433578 R1 Supplementary Figure S1 231107.pdf
- CIMB-2433578 R1 Supplementary Figure S2 231107.pdf
