# Supplementary material for: MAP3K19 Affects TWEAK-Induced Response in Cultured Bronchial Epithelial Cells and Regulates Allergic Airway Inflammation in an Asthma Murine Model
Source: Curr Issues Mol Biol. 2023 Nov 8;45(11):8907–24. doi: 10.3390/cimb45110559 (PMC10670632; doi:10.3390/cimb45110559)
Supplement: Supplementary file 1 [file cimb-45-00559-s001.zip › AAIR-2022-0298 Supplementary Table S2.xlsx]

## Sheet: Sheet1
Supplementary Table S2. The detection limits of the multiplex bead array assays and ELISA
Target	Assay working range (pg/mL)
	LLOQ	ULOQ
IL-1β	2.5	40796
IL-2	3.4	55822
IL-5	1.9	30368
IL-6	0.9	14984
IL-10	1.3	20628
IL-12p40	1.7	27652
IL-12p70	1.6	26771
IL-17	0.8	49444
eotaxin-1	2.9	46902
GM-CSF	2.8	46241
IFN-γ	0.4	25496
KC	1.7	27847
MIP-1α	1.8	29208
RANTES	1	15596
TNF-α	2.7	43868
Abbreviations: GM-CSF, Granulocyte Macrophage colony-stimulating Factor; IFN-γ, interferon-gamma; IL, interleukin; KC, Keratinocyte-derived chemokines; LLOQ, lower limit of quantitation; MIP,macrophage inflammatory protein; RANTES,regulated on activation normal T cell expressed and secreted; TNF, tumor necrosis factor; ULOQ, upper limit of quantitation.
