# Supplementary material for: MAP3K19 Affects TWEAK-Induced Response in Cultured Bronchial Epithelial Cells and Regulates Allergic Airway Inflammation in an Asthma Murine Model
Source: Curr Issues Mol Biol. 2023 Nov 8;45(11):8907–24. doi: 10.3390/cimb45110559 (PMC10670632; doi:10.3390/cimb45110559)
Supplement: Supplementary file 1 [file cimb-45-00559-s001.zip › AAIR-2022-0298 Supplementary Table S3.xlsx]

## Sheet: Sheet1
Supplementary Table S3. Primer sequences for real-time PCR.
Target	Sense primer (5’ 3’)	Antisense primer (5’ 3’)
E-cadherin	ACCTCCATCACAGAGGTTCC	GAAGCCGAGGTTTTAACTGC
MAP3K19	AATGGCACCCACAGTGACATGCTT	CCCTCGGTGTGCTCCGATGTAAAA
MKP-1	CCCTGAGTACTAGCGTCCCT	GGGCCACCCTGATCGTAGAG
N-cadherin	AGCCAACCTTAACTGAGGAGT	GGCAAGTTGATTGGAGGGATG
RANTES	AACCCAGCAGTCGTCCACAG	TTGTTCAGCCGGGAGTCATAC
TARC	CTTCAAGGGAGCCATTCCCC	TACAAAAACGATGGCATCCCTG
TSLP	CGCGTCGCTCGCCAAAGAAAT	TGAAGCGACGCCACAATCCTTG
GAPDH	GGTCTCCTCTGACTTCAACA	GTGAGGGTCTCTCTCTTCCT
MAP3K19 (mouse)	AGGCTATCTTCTGGACCAAG	GTATTCCTTCTCGGTAGCCA
GAPDH (mouse)	AACTTTGGCATTGTGGAAGG	GGATGCAGGGATGATGTTCT
